# Supplementary material for: The Mont Blanc Study: The effect of altitude on intra ocular pressure and central corneal thickness
Source: PLoS One. 2020 Aug 7;15(8):e0237343. doi: 10.1371/journal.pone.0237343 (PMC7413504; doi:10.1371/journal.pone.0237343)
Supplement: S1 Dataset — (XLS) [file pone.0237343.s001.xls]

## Sheet: data
ICARE ore 9
Condizione
Pavia	19	18	15	14	18	17	15	16	19	18	10	12	26	22	20	20	12	10	15	12	16	15	14	16	15.5	16	9.5	10	18	17	17	16.5	15	12	12	11	13.5	14.5	11	11	13	13	16.5	16	14	14	17	14	11.5
Courmayeour	15	12.5	11.5	10.5	15	16.5	11	10.5	17	14.5	11	12	17	18.5	23	24	10	10	16	13	12	16	12	12.5	14	14.5	15.5	12	13	13	20	19	16	16.5	16	13	18	19.5	13	15	12	12	11	15	14	13	11	15	9.5
MB	17	16	15.5	12.5	17.5	16.5	13	14.5	14	12	11.5	12	16.5	15	22	20	10	13	15	14	20	18	10.5	10.5	17	15	13.5	14.5	20	19.5	18	14.5	17.5	18	13	12.5	15	14.5	12	9	13	13	15	13	14	14	16	15	13
Perkins ore 9
Pavia	10	10	12	12	18	17	12	13	16	14	9	15	16	18	15	15	11	11	10	10	10	10	10	10	13	11	13	12	14	12	12	14	10	11	10	9	14	14	8	8	11	11	13	12	12	12	12	12	12
Courmayeour	12	12	12	10	6	5	13	9	9	9	13	13	18	18	14	14	7	8	13	12	8	8	16	15	15	15	10	12	14	16	17	16	10	12	10	10	10	10	10	10	16	15	16	15	18	14	9	9	9
MB	12	12	16	10	10	10	11	11	13	12	12	12	16	16	11	10	8	6	10	7	11	11	11	11	16	16	11	12	18	18	14	14	18	18	11	11	14	14	9	8	9	12	8	8	10	11	9	8	9
CCT
Pavia	548	535	511	503	559	561	539	540	549	554	550	555	613	614	599	593	560	569	492	500	634	659	574	576	546	550	571	566	578	572	578	593	550	541	536	538	558	558	540	527	500	500	526	538	548	561	547	537	542
Courmayeour	538	539	511	509	565	571	530	547	551	559	552	550	602	600	597	583	559	565	488	491	638	642	574	573	557	560	566	563	580	571	569	570	578	567	538	548	571	560	528	525	492	494	525	535	546	558	543	532	539
MB	546	545	513	508	557	554	537	542	555	559	567	567	627	618	592	586	563	574	497	489	633	641	587	587	555	558	581	577	617	585	564	580	571	567	570	543	566	560	527	527	497	497	525	535	549	558	533	536	550
ICARE ore 11
Pavia	15	16	12.5	11.5	21	21	16	14	13	12	13	15	20	21	18	12	8	10	13	10	12	12	13	15	14	11.5	13	12.5	16	14	17	16.5	19	17	11	9.5	10	11.5	8	7.5	13	12.5	15	15	14.5	15.5	15	15	13.5
MB 2	17	16.5	10.5	10.5	19.5	16	9.5	10	13.5	13.5	10.5	11	14.5	13	16	17	9	9	13	11	18	17	10	8.5	10.5	8.5	11.5	8	19	18	20	14	15.5	15	11.5	13	11	13	10	10	9	9	11	12	10	9	14	12	14
Perkins ore 11
Pavia	10	10	9	9	16	14	13	16	17	15	11	12	17	15	12	10	9	9	8	8	8	8	8	9	10	11	12	10	11	11	11	11	10	10	10	9	10	10	8	7	10	9	11	10	10	10	12	10	11
MB 2	10	10	14	14	9	9	11	9	12	12	14	14	12	12	10	10	12	12	10	11	8	9	10	12	10	10	16	16	16	16	11	11	18	18	14	14	10	10	7	8	8	8	8	8	9	10	10	11	11
ICARE ore 13
Pavia	13	12	13	12.5	21	20	13	13	12	15	10	13	20	18	21	20	10	11	15	16	17	16	13	15	12	13	10	12	15	10	19	17.5	16.5	15	11.5	10	11.5	13.5	12	12.5	12	12	14	12.5	16.5	17.5	20	19	13
MB 2	13	18	15.5	14	17.5	17.5	10.5	10	12.5	11	15	12	12	13.5	16	17	9	11	12	12	14	11	8	9	16.5	15	12	9	22	16.5	16.5	16	17.5	16.5	14	15	10.5	12.5	8	9	10	15	14	19	10	9	15	13	14.5
Perkins ore 13
Pavia	12	12	9	9	16	16	12	12	16	16	11	12	16	14	21	16	10	10	11	11	10	10	9	9	10	10	12	10	11	11	10	11	11	10	11	11	11	10	7	8	10	10	10	10	13	12	9	8	10
MB 2	10	9	12	12	9	9	9	12	7	7	14	13	10	10	10	10	10	10	10	10	10	10				10	20	20	15	15	16	16	16	16	12	12	9	11	7	8	8	8	8	8	7	8	9	8	10
ICARE ore 15
Pavia	14	12	11.5	10.5	20	20	12	13	17	18	11	11	17	14	21	19	10	11	14	14	20	18	13	14	14	13.5	14	13.5	22	18	19	16.5	14	13	11	11.5	10	10.5	9.5	8.5	10.5	13.5	14.5	16	16.5	16.5	17	18	14.5
MB 2	14	14.5	12.5	10.5	17	17.5	11.5	10	12.5	12.5	9	9	15	11.5	21	18.5	10	10.5	10	10.5	14.5	13.5	8	9	14.5	14.5	10	8	18	17.5	17.5	15	15	12.5	14.5	15	12	12	12	11	10.5	11.5	15.5	15	12.5	12.5	14	13	14
Perkins ore 15
Pavia	9	10	7	7	14	15	13	11	16	16	11	14	14	14	10	10	7	7	10	9	15	15	8	8	13	15	10	10	9	9	11	12	8	8	9	11	9	9	12	11	9	8	11	16	13	14	12	12	11
MB 2	7	5	10	10	9	10	9	8	16	14	10	10	10	10	9	10	5	6	8	9	14	12	10	9	10	10	10	10	12	12	12	12	10	10	14	14	12	12	7	8	8	8	5	5	9	10	13	12	6
I care caldo-freddo
interno	17	16	15.5	12.5	17.5	16.5	13	14.5	14	12	11.5	12	16.5	15	22	20	10	13	15	14	20	18	10.5	10.5	17	15	13.5	14.5	20	19.5	18	14.5	17.5	18	13	12.5	15	14.5	12	9	13	13	15	13	14	14	16	15	13
esterno	18	17	18	18	27	23	16	15	18	15	13	6	13	19	24	23	11	15	12	16	19	16	11	9	15	10	10	16	30	26	20	23	19	17	18	20	21	22	16	12	17	18	21	25	18	20	19	16	14
CCT caldo-freddo
interno	546	545	513	508	557	554	537	542	555	559	567	567	627	618	592	586	563	574	497	489	633	641	587	587	555	558	581	577	617	585	564	580	571	567	570	543	566	560	527	527	497	497	525	535	549	558	533	536	550
esterno	555	544	555	544	575	588	543	546	552	557	556	555	613	597	595	595	571	576	497	496	639	641	564	571	559	570	568	581											532	529	493	498	533	538	547	579	541	539	537
Media curva Perkins
Pavia	10.25	10.5	9.25	9.25	16	15.5	12.5	13	16.25	15.25	10.5	13.25	15.75	15.25	11.5	11	9.25	9.25	10	9.25	11	11	9.75	9.75	11.25	11.25	11.25	10.5	11.25	10.75	11	12	9.75	9.75	10	10	11	10.75	8.75	8.5	9.75	9.25	11.5	12.25	11.5	11.25	12.25	11.75	11
MB2	9.75	9	13	11.5	9.25	9.5	10	10	12	11.25	12.5	12.25	12	12	10.25	10.25	8.75	8.5	12	11.75	12	11.75	9.5	10	11.25	11	11.75	12	13.25	13.25	13.25	13.25	15.5	15.5	12.75	12.75	11.25	11.75	7.5	8	7.5	8.75	7.25	7.5	9	10	10.5	10.25	9.25
Media curva I care
Pavia	15.25	14.5	14	12.75	20	19.5	14	14	15.25	15.75	11	12.75	20.75	18.75	20	17.75	10	10.5	14.25	13	16.25	15.25	13.25	15	13.25	12.5	10.75	10.75			18.25	16.75	15.75	15.25	11.75	11.5	11.5	13.5	9.75	9.75	11.25	12.5	14.5	14.25	14.5	14.5			13.25
MB2	13.75	15	13	11.5	18	16.25	11	11.5	13.75	12.75	12.25	11.75	16.25	15	19	18	8	10	10	10	13	13	10	9.75	14.5	14	13.25	11.25	20.25	18.75	18.5	14.5	16.25	16.75	14	14.75	12.25	13.25	12	12	11	11	16	15	11	12	15	13	13.75
Media curva I care nuovo
Pavia			12	11.5																					14.5	14.5	12.5	13.25	17.75	14.75	17.75	16.75	16.5	13.25	11	9.5	11	11.5	10.5	10	13	13	15.5	15.5	16.25	17.25	17.25	16.5	13
MB2	16.75	17.5	14	12.25	17.75	17.5	11.25	10.75	12.5	11.75	10.75	10.25	12.75	11.5	19.25	18.25	10	11	12.5	12	17	15	8.25	8.75	14.75	12.5	10.25	8.5	19.25	17	17.5	15.25	16.5	14.25	12.5	13	12	12.75	10.5	9.5	10.5	12.25	13.75	14.75	12	11.25	14.5	13.25	14
I care nuovo ore 13
			13	13																					12	14	12	14	15	10	19	17	18	15	12	9	12	12	13	12	14	12	15	15	18	20	20	19	12
	14	22	15	14	20	20	11	10	12	10	14	10	10	12	16	17	9	11	12	12	14	11	7	9	17	15	10	9	25	15	16	17	19	15	13	12	9	11	8	9	10	15	14	19	10	9	15	13	15
PA diastolica
Pavia	60	60	70	70	80	80	70	70	70	70	70	70	70	70	70	70	70	70	65	65	70	70	65	65	70	70	65	65	80	80	60	60	60	60	70	70	60	60	60	60	65	65	80	80	60	60	60	60	70
Courma	75	75	85	85	80	80	80	80	70	70	85	85	70	70	70	70	85	85	70	70	70	70	70	70	95	95	90	90	90	90	75	75	70	70	90	90	90	90	80	80	95	95	85	85	70	70	75	75	80
MB	75	75	85	85	85	85	65	65	80	80	100	100	80	80	70	70	60	60	70	70	90	90	85	85	80	80	80	80	80	80	75	75	60	60	95	95	95	95	75	75	80	80	85	85	70	70	75	75	70
PA sistolica
Pavia	100	100	120	120	140	140	110	110	110	110	130	130	110	110	110	110	120	120	110	110	110	110	120	120	125	125	125	125	120	120	110	110	110	110	130	130	120	120	110	110	115	115	130	130	110	110	110	110	110
Courma	120	120	140	140	130	130	125	125	125	125	140	140	110	110	110	110	135	135	120	120	110	110	115	115	125	125	120	120	130	130	120	120	120	120	135	135	130	130	130	130	135	135	130	130	130	130	135	135	120
MB	100	100	135	135	135	135	135	135	130	130	140	140	125	125	125	125	110	110	115	115	135	135	110	110	120	120	130	130	115	115	120	120	110	110	135	135	125	125	120	120	130	130	130	130	120	120	120	120	120
FC
Pavia	75	75	67	67	70	70	62	62	64	64	80	80	78	78	68	68	100	100	90	90	62	62	70	70	68	68	56	56	50	50	63	63	74	74	80	80	60	60	56	56	64	64	60	60	80	80	60	60	72
Courma	90	90	60	60	88	88	97	97	58	58	67	67	66	66	60	60	84	84	65	65	68	68	96	96	68	68	64	64	60	60	54	54	72	72	87	87	63	63	76	76	79	79	79	79	91	91	96	96	88
MB	70	70	76	76	83	83	82	82	65	65	70	70	72	72	69	69	104	104	75	75	62	62	86	86	74	74	60	60	70	70	62	62	85	85	102	102	70	70	73	73	79	79	89	89	94	94	92	92	81
pO2
Pavia	99	99	99	99	99	99	99	99	99	99	99	99	99	99	99	99	99	99	99	99	99	99	99	99	99	99	99	99	99	99	99	99	99	99	99	99	99	99	99	99	99	99	99	99	99	99	99	99	99
Courma	98	98	97	97	97	97	96	96	99	99	96	96	96	96	89	89	97	97	98	98	98	98	98	98	96	96	96	96	98	98	98	98	99	99	97	97	95	95	99	99	98	98	97	97	94	94	99	99	97
MB	92	92	91	91	90	90	87	87	91	91	88	88	88	88	92	92	89	89	86	86	87	87	90	90	89	89	86	86	88	88	93	93	90	90	87	87	87	87	90	90	83	83	86	86	87	87	89	89	89
FC
Pavia
Courma
MB
[truncated: 17 more columns]
